# Supplementary material for: Cost-effectiveness analyses and cost analyses in castration-resistant prostate cancer: A systematic review
Source: PubMed Central journal article supplement (PMC6281264; doi:10.1371/journal.pone.0208063), 2018-12-05
Supplement: pone.0208063.s001.pdf [file pone.0208063.s001.pdf]

**S1 Table. Budget-impact analyses – General characteristics, incremental costs per member per month and incremental total costs (in 2015 US\$-PPP)**

| Reference             | Country | Patients               | Eligible population (per 1,000,000 per year) | Intervention  | Perspective | Year of pricing | Time horizon (months) | Cost of new intervention (per month) | Incremental costs per member (per month) | Incremental total costs (per 1,000,000 per year) |
|-----------------------|---------|------------------------|----------------------------------------------|---------------|-------------|-----------------|-----------------------|--------------------------------------|------------------------------------------|--------------------------------------------------|
| Bui et al. [88]       | US      | mCRPC                  | 115                                          | EZ            | PAY         | 2014            | 12                    | 8,604                                | 0.040                                    | 515,871                                          |
| Collins et al. [56]   | UK      | mCRPC                  | 42*                                          | DX+P          | PAY         | 2004            | 12                    | 8,487-9,206                          | –                                        | 356,580-386,968*                                 |
| Flannery et al. [91]  | US      | DX-refractory<br>mCRPC | 12                                           | CX            | PAY         | 2015            | 12                    | 5,054                                | 0.528                                    | 6,331,704                                        |
| Markowski et al. [89] | US      | mCRPC                  | 94**                                         | AR-V7 testing | PAY         | 2016***         | 12                    | 1,000                                | –                                        | –468,854**                                       |
| Sorensen et al. [90]  | US      | DX-refractory<br>mCRPC | 5.7                                          | A+P           | PAY         | 2012            | 18                    | 6,075                                | 0.009-0.012                              | 36,035-105,982                                   |

A: abiraterone, AR-V7: Androgen receptor variant-7, CX: cabazitaxel, DX: docetaxel, EZ: enzalutamide, mCRPC: metastatic castration-resistant prostate cancer, P: prednisone/prednisolone, PAY: payer's perspective UK: United Kingdom, US: United States.

\* Based on United Nations estimates of the UK population in 2015 (65,397,080) [135], \*\* based on United Nations estimates of the US population in 2015 (319,929,162) [135], \*\*\* the submission year/study year was assumed as base year.

## References

- United Nations DoEaSA, Population Division,. World population prospects: the 2017 revision, DVD edition; 2017. New York: United Nations. Available from: <https://esa.un.org/unpd/wpp/Download/Standard/Population/>. Cited 15.05.2018.
