# Supplementary material for: Cost-effectiveness analyses and cost analyses in castration-resistant prostate cancer: A systematic review
Source: PubMed Central journal article supplement (PMC6281264; doi:10.1371/journal.pone.0208063), 2018-12-05
Supplement: pone.0208063.s004.pdf [file pone.0208063.s004.pdf]

**S4 Table. Quality assessment of included cost-of-illness analyses (based on Stuhldreher et al. [44])**

| Reference                                                     | Alemayehu<br>[74] | Armstrong<br>[75] | Bourke<br>[76] | Bryant-<br>Lukosius<br>[77] | Bui<br>[78] | Dragomir<br>[79] | Engel-<br>Nitz<br>[80] | Krahn<br>[81] | Kunisawa<br>[82] | Malmberg<br>[83] | Mehra<br>[84] | Organ<br>[85] | Sanyal<br>[86] | Satoh<br>[55] | Sherman<br>[87] | Studies that<br>fulfilled the<br>respective<br>criterion (%) |
|---------------------------------------------------------------|-------------------|-------------------|----------------|-----------------------------|-------------|------------------|------------------------|---------------|------------------|------------------|---------------|---------------|----------------|---------------|-----------------|--------------------------------------------------------------|
| <b>Scope</b>                                                  |                   |                   |                |                             |             |                  |                        |               |                  |                  |               |               |                |               |                 |                                                              |
| Study objective                                               | ✓                 | ✓                 | ✓              | ✓                           | ✓           | ✓                | ✓                      | ✓             | ✓                | ✓                | ✓             | ✓             | ✓              | ✓             | ✓               | 100%                                                         |
| Inclusion and exclusion criteria                              | ✓                 | ✓                 |                | ✓                           | ✓           |                  | ✓                      | ✓             | ✓                |                  |               | ✓             |                |               | ✓               | 60%                                                          |
| Disease and diagnostic criteria                               | ✓                 | ✓                 |                |                             | ✓           |                  | ✓                      | ✓             |                  |                  | ✓             |               |                | ✓             |                 | 47%                                                          |
| <b>General economic</b>                                       |                   |                   |                |                             |             |                  |                        |               |                  |                  |               |               |                |               |                 |                                                              |
| Cost-description                                              | ✓                 | ✓                 | ✓              | ✓                           | ✓           | ✓                | ✓                      | ✓             | ✓                | ✓                | ✓             | ✓             | ✓              | ✓             | ✓               | 100%                                                         |
| Non-diseased comparison<br>group or disease-specific<br>costs | ✓                 |                   |                |                             |             | ✓                |                        |               |                  | ✓                |               |               | ✓              |               |                 | 27%                                                          |
| <b>Calculation of costs</b>                                   |                   |                   |                |                             |             |                  |                        |               |                  |                  |               |               |                |               |                 |                                                              |
| Currency                                                      | ✓                 | ✓                 | ✓              | ✓                           | ✓           | ✓                | ✓                      | ✓             | ✓                | ✓                | ✓             | ✓             | ✓              | ✓             | ✓               | 100%                                                         |
| Reference year                                                | ✓                 | ✓                 | ✓              | ✓                           | ✓           | ✓                | ✓                      | ✓             | ✓                | ✓                |               | ✓             | ✓              |               |                 | 80%                                                          |
| Perspective                                                   | ✓                 | ✓                 | ✓              | ✓                           |             | ✓                |                        |               |                  |                  | ✓             |               | ✓              |               |                 | 47%                                                          |
| Costs incorporated from more<br>than one category             | ✓                 | ✓                 | ✓              | ✓                           | ✓           | ✓                | ✓                      | ✓             | ✓                | ✓                | ✓             | ✓             | ✓              | ✓             | ✓               | 100%                                                         |
| Data source                                                   | ✓                 | ✓                 | ✓              | ✓                           | ✓           | ✓                | ✓                      | ✓             | ✓                | ✓                | ✓             | ✓             | ✓              | ✓             | ✓               | 100%                                                         |
| Valuation of costs                                            | n.a.              | n.a.              | n.a.           | ✓                           | n.a.        | n.a.             | n.a.                   | ✓             | n.a.             | n.a.             | n.a.          | n.a.          | n.a.           | n.a.          | ✓               | 100%                                                         |
| Discounting                                                   |                   |                   | n.a.           | n.a.                        |             |                  |                        |               |                  | ✓                |               |               | ✓              |               | n.a.            | 17%                                                          |
| <b>Study design and analysis</b>                              |                   |                   |                |                             |             |                  |                        |               |                  |                  |               |               |                |               |                 |                                                              |

|                                                          |      |      |      |      |      |      |      |     |     |      |      |      |      |      |      |      |
|----------------------------------------------------------|------|------|------|------|------|------|------|-----|-----|------|------|------|------|------|------|------|
| Missing data and imputation method                       | n.a. | n.a. | n.a. | n.a. | n.a. | n.a. | n.a. | ✓   |     | n.a. | n.a. | n.a. | n.a. | n.a. | n.a. | 50%  |
| Statistics appropriate                                   | ✓    |      |      | ✓    | ✓    | ✓    | ✓    | ✓   |     | ✓    | ✓    |      | ✓    |      | ✓    | 67%  |
| Sensitivity analyses                                     |      |      |      |      |      |      |      | ✓   | ✓   |      |      |      | ✓    |      |      | 20%  |
| <b>Presentation of results</b>                           |      |      |      |      |      |      |      |     |     |      |      |      |      |      |      |      |
| Sample size (subgroup)                                   | ✓    | ✓    | n.a. | ✓    | ✓    | ✓    | ✓    | ✓   | ✓   | ✓    | ✓    | ✓    | n.a. | ✓    | ✓    | 100% |
| Demographics                                             | ✓    |      |      |      | ✓    | n.a. |      |     | ✓   |      | ✓    | ✓    | n.a. | ✓    | ✓    | 54%  |
| Arithmetic mean costs                                    | ✓    | ✓    | ✓    | ✓    | ✓    | ✓    | ✓    | ✓   | ✓   | ✓    | ✓    | ✓    | ✓    | ✓    | ✓    | 100% |
| Standard deviations (errors)                             | ✓    |      | ✓    | ✓    | ✓    | ✓    |      |     | ✓   |      |      |      | ✓    | ✓    |      | 53%  |
| <b>Discussion</b>                                        |      |      |      |      |      |      |      |     |     |      |      |      |      |      |      |      |
| Results discussed with respect to other studies          | ✓    | ✓    |      | ✓    |      | ✓    | ✓    | ✓   | ✓   | ✓    | ✓    | ✓    | ✓    | ✓    | ✓    | 87%  |
| Limitations discussed                                    | ✓    | ✓    | ✓    | ✓    | ✓    | ✓    | ✓    | ✓   | ✓   | ✓    | ✓    | ✓    | ✓    | ✓    | ✓    | 100% |
| Conclusions appropriate regarding uncertainty in results | ✓    | ✓    | ✓    | ✓    |      | ✓    | ✓    | ✓   | ✓   | ✓    | ✓    | ✓    | ✓    | ✓    | ✓    | 93%  |
| <b>Criteria each study fulfilled (%)</b>                 | 90%  | 70%  | 61%  | 80%  | 70%  | 84%  | 70%  | 73% | 71% | 70%  | 70%  | 65%  | 89%  | 65%  | 70%  |      |

✓: Criterion fulfilled, n.a.: not applicable.
