# Supplementary material for: Cost-effectiveness analyses and cost analyses in castration-resistant prostate cancer: A systematic review
Source: PubMed Central journal article supplement (PMC6281264; doi:10.1371/journal.pone.0208063), 2018-12-05
Supplement: pone.0208063.s005.pdf [file pone.0208063.s005.pdf]

**S5 Table. Risk of bias assessment of included cost-effectiveness analyses (based on the ECOBIAS checklist [45])**

| Reference                                | Andronis<br>[57] | Bloomfield<br>[58] | James<br>[59] | Reed<br>[60] | Studies that fulfilled<br>the respective<br>criterion (%) |
|------------------------------------------|------------------|--------------------|---------------|--------------|-----------------------------------------------------------|
| Narrow perspective bias                  |                  | ✓                  | ✓             | ✓            | 75%                                                       |
| Inefficient comparator bias              | ✓                | ✓                  | ✓             | ✓            | 100%                                                      |
| Cost measurement omission bias           | ✓                | ✓                  | ✓             |              | 75%                                                       |
| Intermittent data collection bias        | ✓                | ✓                  | ✓             | ✓            | 100%                                                      |
| Invalid valuation bias                   | ✓                | ✓                  | ✓             | (✓)          | 75%                                                       |
| Ordinal ICER bias                        | ✓                | ✓                  | ✓             | ✓            | 100%                                                      |
| Double-counting bias                     | n.a.             | n.a.               | n.a.          | n.a.         | –                                                         |
| Inappropriate discounting bias           | ✓                | ✓                  | ✓             | (✓)          | 75%                                                       |
| Limited sensitivity analysis bias        |                  | (✓)                | ✓             | (✓)          | 25%                                                       |
| Sponsor bias                             |                  |                    | ✓             | (✓)          | 25%                                                       |
| Reporting and dissemination bias         | (✓)              | (✓)                | ✓             |              | 25%                                                       |
| <b>Criteria each study fulfilled (%)</b> | 60%              | 70%                | 100%          | 40%          |                                                           |

✓: Criterion fulfilled, (✓): criterion partially fulfilled, ECOBIAS: Bias in Economic Evaluation, n.a.: not applicable.
